# Supplementary material for: Nitrogen Allocation Tradeoffs Within-Leaf between Photosynthesis and High-Temperature Adaptation among Different Varieties of Pecan (Carya illinoinensis [Wangenh.] K. Koch)
Source: MDPI journal article supplement (doi:10.3390/plants11212828), 2022-10-24
Supplement: s1 [file s1]

## Supplementary Materials

### **Nitrogen Allocation Tradeoffs Within-Leaf between Photosynthesis and High-Temperature Adaptation among Different Varieties of Pecan (*Carya illinoensis* [Wangenh.] K. Koch)**

Qiwen Xu, Huichuan He, Binghui He\*, Tianyang Li, Yumin Liu, Shunyao Zhu,  
Gaoning Zhang

College of Resources and Environment, Southwest University, Chongqing 400715, China

\*Correspondence: hebinghui@swu.edu.cn; Tel.: +86-23-68251249

**Table S1.** Eight varieties of *Carya illinoensis* for testing.

| Variety | Number               | The institution of selection and breeding                                        | Origin                   |
|---------|----------------------|----------------------------------------------------------------------------------|--------------------------|
| Mahan   | Su R-ETS-CI-002-2011 | Institute of Botany, Jiangsu Province and Chinese Academy of Sciences            | America                  |
| YLC10   | Zhe R-SC-CI-009-2011 | Research Institute of Subtropical Forestry, Chinese Academy of Forestry.; et al. | Zhejiang Province, China |
| YLC12   | Zhe R-SC-CI-010-2011 | Research Institute of Subtropical Forestry, Chinese Academy of Forestry.; et al. | Zhejiang Province, China |
| YLC13   | Zhe R-SC-CI-011-2011 | Research Institute of Subtropical Forestry, Chinese Academy of Forestry.; et al. | Zhejiang Province, China |
| YLC29   | Zhe R-SC-CI-013-2011 | Research Institute of Subtropical Forestry, Chinese Academy of Forestry.; et al. | Zhejiang Province, China |
| YLC35   | Zhe R-SC-CI-014-2011 | Research Institute of Subtropical Forestry, Chinese Academy of Forestry.; et al. | Zhejiang Province, China |
| YLJ042  | Zhe S-SV-CI-006-2006 | Research Institute of Subtropical Forestry, Chinese Academy of Forestry.; et al. | Zhejiang Province, China |
| YLJ5    | Zhe S-SV-CI-002-2006 | Research Institute of Subtropical Forestry, Chinese Academy of Forestry.; et al. | Zhejiang Province, China |
